# Supplementary material for: Copper Chaperone Atox1 Interacts with Cell Cycle Proteins
Source: PubMed Central journal article supplement — Comput Struct Biotechnol J. 2018 Oct 31;16:443–9. doi: 10.1016/j.csbj.2018.10.018 (PMC6231052; doi:10.1016/j.csbj.2018.10.018), 2018-10-31
Supplement: mmc1.pdf [file mmc1.pdf]

# Supporting Information

## Copper chaperone Atox1 interacts with cell cycle proteins

By Maria Matson Dzebo, Stéphanie Blockhuys, Sebastian Valenzuela, Emanuele Celauro,  
Elin K. Esbjörner and Pernilla Wittung-Stafshede

### Content

Figures S1-S4

Table S1 (co-IP in HEK293T cells)

Table S2 (co-IP in MDA-MB-231 cells)

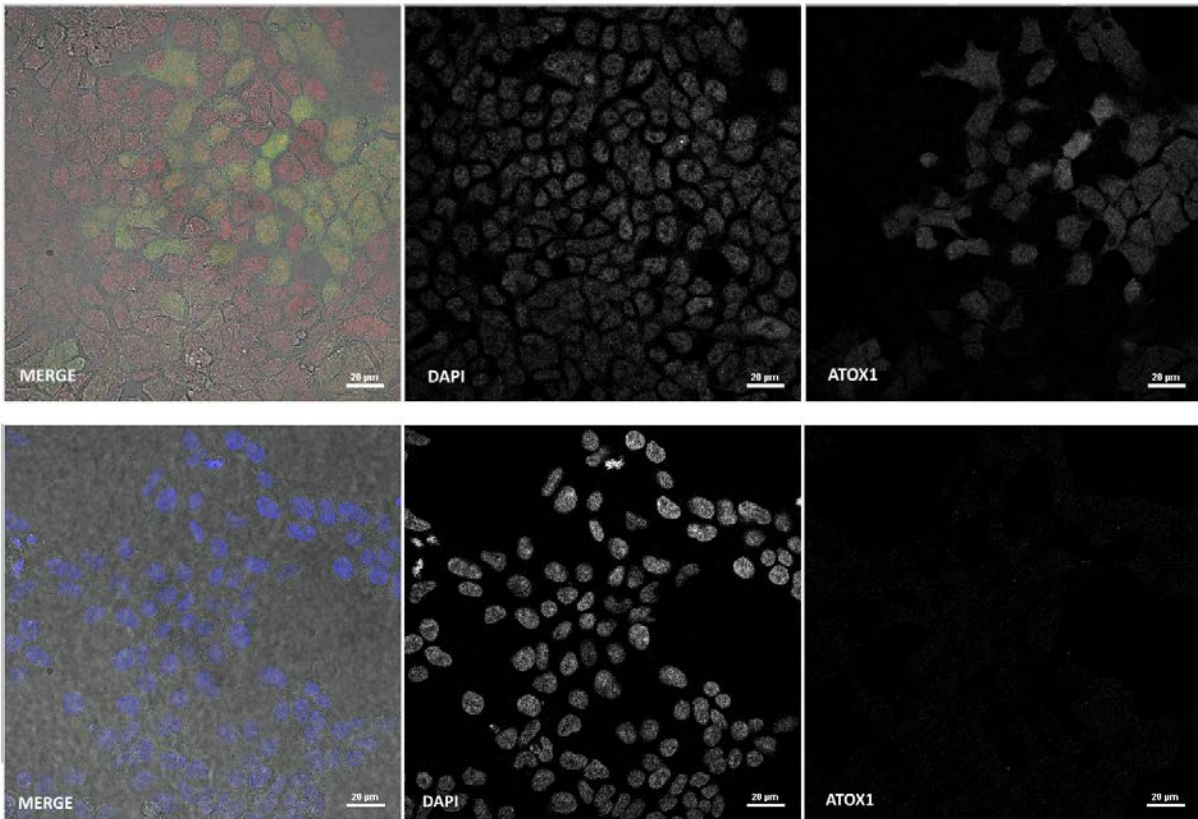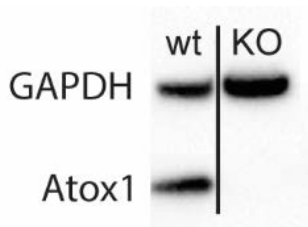

**Figure S1.** LoxP cassettes knock-in, followed by Cre-mediated excision, was used to knock-out the *Atox1* gene in HEK293T cells. The success rate of resulting *Atox1* deletion was estimated to be 70 %, based on immunostaining (top panel, *Atox1* signal in green). Subsequent selections by dilution resulted in the isolation of monoclonal cell lines with complete lack of *Atox1* expression (middle panel, representative image from the cell line, clone B10, used in this paper). Successful and irreversible removal of the *Atox1* gene was also confirmed by Western blot (bottom, GAPDH used for normalization).

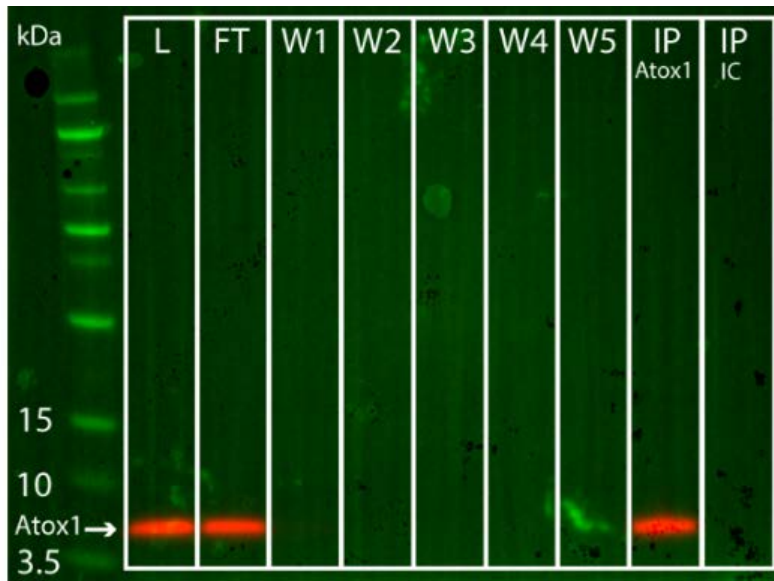

**Figure S2.** Detection of Atox1 in co-IP samples using western blot (red) and colorimetric detection of the protein standard (green). (Abbreviations: L is the lysate, FT the flow through, W1-5 are washes, IP are the immunoprecipitates where IC is isotype control).

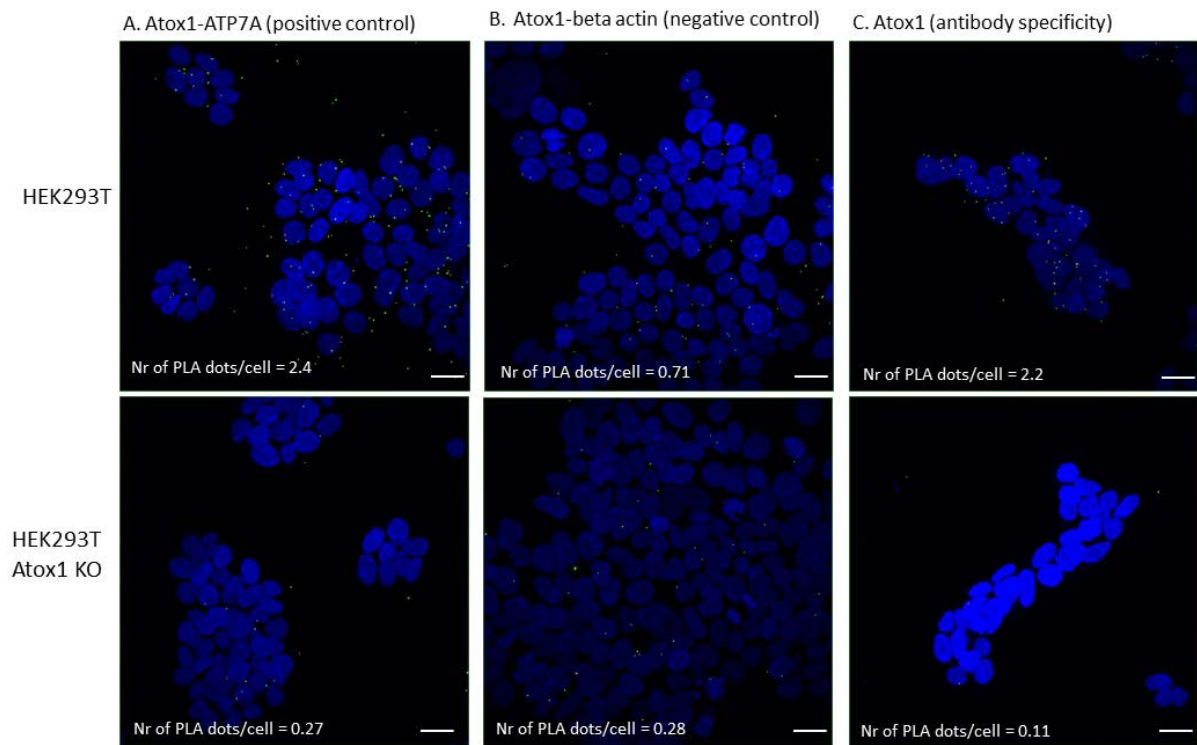

**Figure S3. PLA controls.** A. Positive control: Atox1-ATP7A interactions detected in wt (upper image) but not in Atox1 KO HEK293T cells (lower image), B. Negative control: Atox1-beta actin interactions not detected in both wt (upper image) and Atox1 KO HEK293T cells (lower image), C. Anti-Atox1 antibody specificity control: Atox1 detected in wt (upper image) cells but not in Atox1 KO HEK293T cells (lower image). Scale bars indicate 20  $\mu\text{m}$ . The number of PLA dots found on average per cell for the presented image is written in the lower left corner.

**A.**

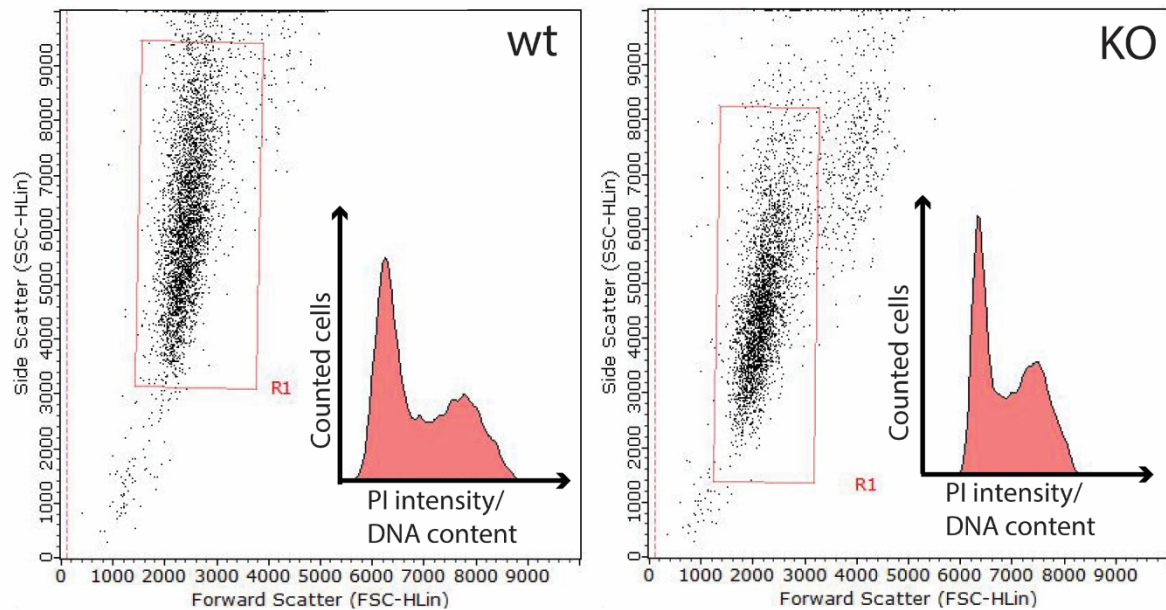

**B.**

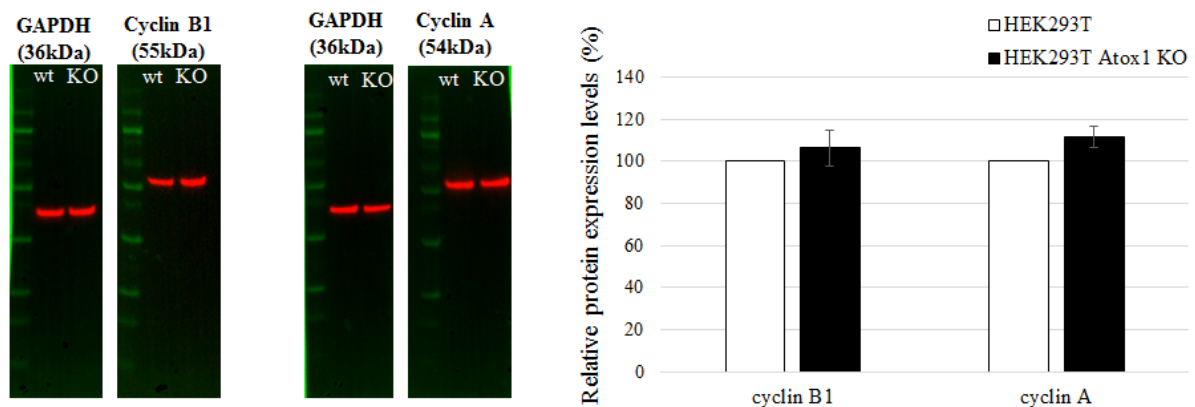

**Fig. S4. A.** Forward and side scatter plots in flow cytometry experiment of wt and KO cells (after gating cells in red area vs width plot), as well as the intensity of propidium iodide (PI), corresponding to DNA content, of the two cell lines. Notably the side scattering is reduced for KO cells, indicating less granularity of these cells. The PI intensity of the cell lines was evaluated for three independent experiments (with three technical repeats each) for the cell types, respectively, and the percentage of cells in the different phases are presented in Fig. 3A. **B.** Western blot for cyclin B1 and cyclin A in wt and Atox1 KO HEK293T cells. Left: Representative immunoblot results (wt=HEK293T and KO=HEK293T Atox1 KO, GAPDH as a loading control). Right: Quantitative Western blot results. Error bars indicate standard error of the mean ( $n_{\text{cyclinB1}}=4$ ;  $n_{\text{cyclinA}}=3$ ).

**Table S1. Proteomic analysis of co-IP with Atox1 antibody as bait in HEK293T cells**

In bold are proteins identified in co-IP with anti-Atox1 monoclonal antibody but not in co-IP with monoclonal IgG isotype antibody as bait (i.e., hits). APC subunits underlined. See Materials for details.

| Accession/Uniprot | Description: protein name (alternative name)                         | MW [kDa]      | # Peptides Atox1 Ab co-IP | # Peptides Control Ab co-IP |
|-------------------|----------------------------------------------------------------------|---------------|---------------------------|-----------------------------|
| P04264            | Keratin, type II cytoskeletal 1                                      | 66,00         | 35,00                     | 34,00                       |
| <b>Q9H1A4</b>     | <b>Anaphase-promoting complex subunit 1</b>                          | <b>216,36</b> | <b>28,00</b>              |                             |
| <b>Q9UJX3</b>     | <b>Anaphase-promoting complex subunit 7</b>                          | <b>66,81</b>  | <b>24,00</b>              |                             |
| P35908            | Keratin, type II cytoskeletal 2 epidermal                            | 65,39         | 31,00                     | 33,00                       |
| P13645            | Keratin, type I cytoskeletal 10                                      | 58,79         | 29,00                     | 29,00                       |
| P35527            | Keratin, type I cytoskeletal 9                                       | 62,03         | 21,00                     | 20,00                       |
| <b>P30260</b>     | <b>Cell division cycle protein 27 homolog (ANAPC3)</b>               | <b>91,81</b>  | <b>20,00</b>              |                             |
| O53H12            | Acylglycerol kinase, mitochondrial                                   | 47,11         | 15,00                     | 7,00                        |
| P24752            | Acetyl-CoA acetyltransferase, mitochondrial                          | 45,17         | 12,00                     | 13,00                       |
| <b>Q9UJX4</b>     | <b>Anaphase-promoting complex subunit 5</b>                          | <b>85,02</b>  | <b>14,00</b>              |                             |
| P30613            | Pyruvate kinase PKLR                                                 | 61,79         | 13,00                     | 7,00                        |
| P08670            | Vimentin OS=Homo sapiens                                             | 53,62         | 16,00                     | 7,00                        |
| <b>Q9UJX2</b>     | <b>Cell division cycle protein 23 homolog (ANAPC8)</b>               | <b>68,79</b>  | <b>13,00</b>              |                             |
| Q16891            | MICOS complex subunit MIC60                                          | 83,63         | 12,00                     | 5,00                        |
| P0DMV8            | Heat shock 70 kDa protein 1A                                         | 70,01         | 14,00                     | 13,00                       |
| P11142            | Heat shock cognate 71 kDa protein                                    | 70,85         | 15,00                     | 14,00                       |
| P13647            | Keratin, type II cytoskeletal 5                                      | 62,34         | 21,00                     | 23,00                       |
| Q9BY77            | Polymerase delta-interacting protein 3                               | 46,06         | 11,00                     | 6,00                        |
| P08779            | Keratin, type I cytoskeletal 16                                      | 51,24         | 21,00                     | 20,00                       |
| P23396            | 40S ribosomal protein S3                                             | 26,67         | 11,00                     | 7,00                        |
| <b>P82979</b>     | <b>SAP domain-containing ribonucleoprotein</b>                       | <b>23,66</b>  | <b>11,00</b>              |                             |
| <b>Q9UJX6</b>     | <b>Anaphase-promoting complex subunit 2</b>                          | <b>93,77</b>  | <b>10,00</b>              |                             |
| P25705            | ATP synthase subunit alpha, mitochondrial                            | 59,71         | 10,00                     | 8,00                        |
| <b>Q13042</b>     | <b>Cell division cycle protein 16 homolog (ANAPC6)</b>               | <b>71,61</b>  | <b>10,00</b>              |                             |
| P11940            | Polyadenylate-binding protein 1                                      | 70,63         | 10,00                     | 4,00                        |
| <b>Q94826</b>     | <b>Mitochondrial import receptor subunit TOM70</b>                   | <b>67,41</b>  | <b>10,00</b>              |                             |
| P06576            | ATP synthase subunit beta, mitochondrial                             | 56,52         | 8,00                      | 6,00                        |
| Q9NX63            | MICOS complex subunit MIC19                                          | 26,14         | 8,00                      | 6,00                        |
| P62829            | 60S ribosomal protein L23                                            | 14,86         | 9,00                      | 6,00                        |
| P62280            | 40S ribosomal protein S11                                            | 18,42         | 9,00                      | 5,00                        |
| P62701            | 40S ribosomal protein S4, X isoform                                  | 29,58         | 9,00                      | 4,00                        |
| P10809            | 60 kDa heat shock protein, mitochondrial                             | 61,02         | 7,00                      | 5,00                        |
| P15924            | Desmoplakin                                                          | 331,57        | 5,00                      | 8,00                        |
| P68104            | Elongation factor 1-alpha 1                                          | 50,11         | 8,00                      | 5,00                        |
| Q99623            | Prohibitin-2                                                         | 33,28         | 8,00                      | 8,00                        |
| P35232            | Prohibitin                                                           | 29,79         | 6,00                      | 7,00                        |
| Q9UHX1            | Poly(U)-binding-splicing factor PUF60                                | 59,84         | 8,00                      | 7,00                        |
| <b>Q9UM13</b>     | <b>Anaphase-promoting complex subunit 10</b>                         | <b>21,24</b>  | <b>7,00</b>               |                             |
| <b>Q9UJX5</b>     | <b>Anaphase-promoting complex subunit 4</b>                          | <b>92,06</b>  | <b>7,00</b>               |                             |
| P02533            | Keratin, type I cytoskeletal 14                                      | 51,53         | 22,00                     | 18,00                       |
| <b>Q13724</b>     | <b>Mannosyl-oligosaccharide glucosidase</b>                          | <b>91,86</b>  | <b>7,00</b>               |                             |
| P22061            | Protein-L-isoaspartate(D-aspartate) O-methyltransferase              | 24,62         | 5,00                      | 7,00                        |
| O43175            | D-3-phosphoglycerate dehydrogenase                                   | 56,61         | 6,00                      | 6,00                        |
| Q95831            | Apoptosis-inducing factor 1, mitochondrial                           | 66,86         | 5,00                      | 5,00                        |
| Q9NVI7            | ATPase family AAA domain-containing protein 3A                       | 71,32         | 19,00                     | 8,00                        |
| P09669            | Cytochrome c oxidase subunit 6C                                      | 8,78          | 6,00                      | 2,00                        |
| <b>Q6P1Q0</b>     | <b>LETM1 domain-containing protein 1</b>                             | <b>41,76</b>  | <b>6,00</b>               |                             |
| P27816            | Microtubule-associated protein 4                                     | 120,93        | 4,00                      | 4,00                        |
| Q14244            | Enscnsln                                                             | 84,00         | 4,00                      | 5,00                        |
| Q7KZ17            | Serine/threonine-protein kinase MARK2                                | 87,86         | 6,00                      | 5,00                        |
| <b>P51955</b>     | <b>Serine/threonine-protein kinase Nek2</b>                          | <b>51,73</b>  | <b>6,00</b>               |                             |
| <b>P09874</b>     | <b>Poly [ADP-ribose] polymerase 1</b>                                | <b>113,01</b> | <b>6,00</b>               |                             |
| Q9NXS2            | Glutaminy-peptide cyclotransferase-like protein                      | 42,90         | 6,00                      | 1,00                        |
| Q9Y310            | tRNA-splicing ligase RtcB homolog                                    | 55,17         | 5,00                      | 2,00                        |
| Q96DA6            | Mitochondrial import inner membrane translocase subunit TIM4         | 12,49         | 6,00                      | 4,00                        |
| P60709            | Actin, cytoplasmic 1                                                 | 41,71         | 4,00                      | 3,00                        |
| P02768            | Serum albumin                                                        | 69,32         | 4,00                      | 4,00                        |
| P48047            | ATP synthase subunit O, mitochondrial                                | 23,26         | 5,00                      | 2,00                        |
| <b>Q12834</b>     | <b>Cell division cycle protein 20 homolog</b>                        | <b>54,69</b>  | <b>5,00</b>               |                             |
| Q9UJS0            | Calcium-binding mitochondrial carrier protein Aralar2                | 74,13         | 5,00                      | 1,00                        |
| P17844            | Probable ATP-dependent RNA helicase DDX5                             | 69,10         | 5,00                      | 2,00                        |
| Q9HBB1            | Peptide deformylase, mitochondrial                                   | 27,00         | 5,00                      | 4,00                        |
| P31689            | DnaJ homolog subfamily A member 1                                    | 44,84         | 5,00                      | 3,00                        |
| Q02413            | Desmoglein-1                                                         | 113,68        | 3,00                      | 5,00                        |
| <b>Q9UM11</b>     | <b>Fizzy-related protein homolog (CDH1)</b>                          | <b>55,15</b>  | <b>5,00</b>               |                             |
| P04406            | Glyceraldehyde-3-phosphate dehydrogenase                             | 36,03         | 5,00                      | 2,00                        |
| P11021            | 78 kDa glucose-regulated protein                                     | 72,29         | 6,00                      | 2,00                        |
| Q14654            | Insulin receptor substrate 4                                         | 133,68        | 5,00                      | 1,00                        |
| Q72794            | Keratin, type II cytoskeletal 1b                                     | 61,86         | 6,00                      | 9,00                        |
| Q43790            | Keratin, type II cuticular Hb6                                       | 53,47         | 11,00                     | 11,00                       |
| P27448            | MAP/microtubule affinity-regulating kinase 3                         | 84,44         | 5,00                      | 5,00                        |
| <b>Q96PY6</b>     | <b>Serine/threonine-protein kinase Nek1</b>                          | <b>142,74</b> | <b>5,00</b>               |                             |
| Q96PK6            | RNA-binding protein 14                                               | 69,45         | 5,00                      | 1,00                        |
| Q6P1L8            | 39S ribosomal protein L14, mitochondrial                             | 15,94         | 5,00                      | 2,00                        |
| Q9H2P0            | Activity-dependent neuroprotector homeobox protein                   | 123,49        | 4,00                      | 1,00                        |
| <b>P51648</b>     | <b>Fatty aldehyde dehydrogenase</b>                                  | <b>54,81</b>  | <b>4,00</b>               |                             |
| <b>Q96DE5</b>     | <b>Anaphase-promoting complex subunit 16</b>                         | <b>11,66</b>  | <b>4,00</b>               |                             |
| P36542            | ATP synthase subunit gamma, mitochondrial                            | 32,98         | 3,00                      | 2,00                        |
| Q96GD4            | Aurora kinase B                                                      | 39,29         | 4,00                      | 1,00                        |
| P81605            | Dermcidin                                                            | 11,28         | 1,00                      | 4,00                        |
| <b>Q8NDZ4</b>     | <b>Deleted in autism protein 1</b>                                   | <b>49,45</b>  | <b>4,00</b>               |                             |
| Q60884            | DnaJ homolog subfamily A member 2                                    | 45,72         | 3,00                      | 3,00                        |
| Q96EY1            | DnaJ homolog subfamily A member 3, mitochondrial                     | 52,46         | 4,00                      | 1,00                        |
| <b>Q8WVX9</b>     | <b>Fatty acyl-CoA reductase 1</b>                                    | <b>59,32</b>  | <b>4,00</b>               |                             |
| P38646            | Stress-70 protein, mitochondrial                                     | 73,63         | 3,00                      | 3,00                        |
| P08238            | Heat shock protein HSP 90-beta                                       | 83,21         | 5,00                      | 1,00                        |
| Q15323            | Keratin, type I cuticular Ha1                                        | 47,21         | 9,00                      | 3,00                        |
| Q8N1N4            | Keratin, type II cytoskeletal 78                                     | 56,83         | 5,00                      | 6,00                        |
| O76011            | Keratin, type I cuticular Ha4                                        | 49,39         | 5,00                      | 4,00                        |
| <b>P42167</b>     | <b>Lamina-associated polypeptide 2, isoforms beta/gamma</b>          | <b>50,64</b>  | <b>4,00</b>               |                             |
| Q9Y383            | Putative RNA-binding protein Luc7-like 2                             | 46,49         | 4,00                      | 1,00                        |
| <b>Q02978</b>     | <b>Mitochondrial 2-oxoglutarate/malate carrier protein</b>           | <b>34,04</b>  | <b>4,00</b>               |                             |
| <b>Q969Z3</b>     | <b>Mitochondrial amidoxime reducing component 2</b>                  | <b>38,00</b>  | <b>4,00</b>               |                             |
| Q9BU61            | NADH dehydrogenase [ubiquinone] 1 alpha subcomplex assembly factor 3 | 20,34         | 3,00                      | 3,00                        |

|        |                                                                               |               |             |       |
|--------|-------------------------------------------------------------------------------|---------------|-------------|-------|
| Q15233 | Non-POU domain-containing octamer-binding protein                             | 54,20         | 2,00        | 4,00  |
| Q9NX40 | <b>OCIA domain-containing protein 1</b>                                       | <b>27,61</b>  | <b>4,00</b> |       |
| P39656 | Dolichyl-diphosphooligosaccharide--protein glycosyltransferase 48 kDa subunit | 50,77         | 4,00        | 4,00  |
| Q9H7Z7 | <b>Prostaglandin E synthase 2</b>                                             | <b>41,92</b>  | <b>4,00</b> |       |
| Q86SQ0 | <b>Pleckstrin homology-like domain family B member 2</b>                      | <b>142,07</b> | <b>4,00</b> |       |
| Q8WUK0 | Phosphatidylycerophosphatase and protein-tyrosine phosphatase 1               | 22,83         | 4,00        | 4,00  |
| P61254 | 60S ribosomal protein L26                                                     | 17,25         | 4,00        | 3,00  |
| P63173 | 60S ribosomal protein L38                                                     | 8,21          | 4,00        | 4,00  |
| P04843 | Dolichyl-diphosphooligosaccharide--protein glycosyltransferase subunit 1      | 68,53         | 4,00        | 1,00  |
| P62277 | 40S ribosomal protein S13 O                                                   | 17,21         | 4,00        | 2,00  |
| P62249 | <b>40S ribosomal protein S16</b>                                              | <b>16,44</b>  | <b>4,00</b> |       |
| P62269 | 40S ribosomal protein S18                                                     | 17,71         | 2,00        | 3,00  |
| P39019 | 40S ribosomal protein S19                                                     | 16,05         | 4,00        | 2,00  |
| P62266 | 40S ribosomal protein S23                                                     | 15,80         | 4,00        | 3,00  |
| P42677 | 40S ribosomal protein S27                                                     | 9,45          | 4,00        | 3,00  |
| Q75396 | <b>Vesicle- trafficking protein SEC22b</b>                                    | <b>24,58</b>  | <b>4,00</b> |       |
| P21796 | <b>Voltage-dependent anion-selective channel protein 1</b>                    | <b>30,75</b>  | <b>4,00</b> |       |
| P12956 | <b>X-ray repair cross-complementing protein 6</b>                             | <b>69,80</b>  | <b>4,00</b> |       |
| Q9Y4W6 | <b>AFG3-like protein 2</b>                                                    | <b>88,53</b>  | <b>3,00</b> |       |
| Q9NWB6 | <b>Arginine and glutamate-rich protein 1</b>                                  | <b>33,20</b>  | <b>3,00</b> |       |
| Q75964 | <b>ATP synthase subunit g, mitochondrial</b>                                  | <b>11,42</b>  | <b>3,00</b> |       |
| Q8WWM7 | <b>Ataxin-2-like protein</b>                                                  | <b>113,30</b> | <b>3,00</b> |       |
| Q86X55 | <b>Histone-arginine methyltransferase CARM1</b>                               | <b>65,81</b>  | <b>3,00</b> |       |
| Q96BQ5 | <b>Coiled-coil domain-containing protein 127</b>                              | <b>30,82</b>  | <b>3,00</b> |       |
| P06493 | Cyclin-dependent kinase 1                                                     | 34,07         | 3,00        | 1,00  |
| Q9GZY4 | <b>Cytochrome c oxidase assembly factor 1 homolog</b>                         | <b>16,68</b>  | <b>3,00</b> |       |
| P08574 | Cytochrome c1, heme protein, mitochondrial                                    | 35,40         |             | 1,00  |
| Q92499 | <b>ATP-dependent RNA helicase DDX1</b>                                        | <b>82,38</b>  | <b>3,00</b> |       |
| Q99615 | <b>DnaJ homolog subfamily C member 7</b>                                      | <b>56,40</b>  | <b>3,00</b> |       |
| Q60762 | Dolichol-phosphate mannosyltransferase subunit 1                              | 29,62         | 3,00        | 1,00  |
| Q9Y295 | Developmentally-regulated GTP-binding protein 1                               | 40,52         | 1,00        | 3,00  |
| Q9NVZ3 | G2 and S phase-expressed protein 1                                            | 76,60         | 3,00        | 2,00  |
| Q00839 | Heterogeneous nuclear ribonucleoprotein U                                     | 90,53         | 3,00        | 1,00  |
| Q9NZ18 | Insulin-like growth factor 2 mRNA-binding protein 1                           | 63,44         | 2,00        | 2,00  |
| P13646 | Keratin, type I cytoskeletal 13                                               | 49,56         | 6,00        | 10,00 |
| Q04695 | Keratin, type I cytoskeletal 17                                               | 48,08         | 10,00       | 10,00 |
| P05787 | Keratin, type II cytoskeletal 8                                               | 53,67         | 8,00        | 8,00  |
| Q9BW19 | Kinesin-like protein KIFC1                                                    | 73,70         | 1,00        | 3,00  |
| Q5T749 | Keratinocyte proline-rich protein                                             | 64,09         | 1,00        | 3,00  |
| Q81WC1 | <b>MAP7 domain-containing protein 3</b>                                       | <b>98,37</b>  | <b>3,00</b> |       |
| Q00325 | Phosphate carrier protein, mitochondrial                                      | 40,07         | 3,00        | 1,00  |
| Q9PJ0J | NADH dehydrogenase [ubiquinone] 1 alpha subcomplex subunit 13                 | 16,69         | 3,00        | 1,00  |
| Q9P032 | NADH dehydrogenase [ubiquinone] 1 alpha subcomplex assembly factor 4          | 20,25         | 2,00        | 3,00  |
| Q75489 | NADH dehydrogenase [ubiquinone] iron-sulfur protein 3, mitochondrial          | 30,22         | 3,00        | 1,00  |
| P19338 | <b>Nucleolin</b>                                                              | <b>76,57</b>  | <b>3,00</b> |       |
| Q9UG56 | <b>Phosphatidylserine decarboxylase proenzyme, mitochondrial</b>              | <b>46,64</b>  | <b>3,00</b> |       |
| P14923 | Junction plakoglobin                                                          | 81,69         | 2,00        | 2,00  |
| P61289 | <b>Proteasome activator complex subunit 3</b>                                 | <b>29,49</b>  | <b>3,00</b> |       |
| Q9HBH5 | Retinol dehydrogenase 14                                                      | 36,84         | 2,00        | 2,00  |
| P26373 | 60S ribosomal protein L13                                                     | 24,25         | 3,00        | 1,00  |
| P83731 | 60S ribosomal protein L24                                                     | 17,77         | 3,00        | 2,00  |
| Q9NX20 | 39S ribosomal protein L16, mitochondrial                                      | 28,43         | 3,00        | 1,00  |
| P62263 | 40S ribosomal protein S14                                                     | 16,26         | 3,00        | 3,00  |
| P60866 | 40S ribosomal protein S20                                                     | 13,36         | 2,00        | 3,00  |
| P62861 | 40S ribosomal protein S30                                                     | 6,64          | 3,00        | 3,00  |
| P46782 | 40S ribosomal protein S5                                                      | 22,86         | 2,00        | 3,00  |
| P62081 | 40S ribosomal protein S7                                                      | 22,11         | 3,00        | 1,00  |
| P14678 | Small nuclear ribonucleoprotein-associated proteins B and B'                  | 24,59         | 3,00        | 3,00  |
| P08865 | 40S ribosomal protein SA                                                      | 32,83         | 2,00        | 1,00  |
| Q9BYN8 | <b>28S ribosomal protein S26, mitochondrial</b>                               | <b>24,20</b>  | <b>3,00</b> |       |
| Q6P1M0 | <b>Long-chain fatty acid transport protein 4</b>                              | <b>72,02</b>  | <b>3,00</b> |       |
| P60468 | Protein transport protein Sec61 subunit beta                                  | 9,97          | 3,00        | 1,00  |
| Q8NBX0 | Saccharopine dehydrogenase-like oxidoreductase                                | 47,12         | 3,00        | 2,00  |
| Q13435 | Splicing factor 3B subunit 2                                                  | 100,16        | 3,00        | 3,00  |
| Q15393 | Splicing factor 3B subunit 3                                                  | 135,49        | 2,00        | 2,00  |
| Q9BQE3 | Tubulin alpha-1C chain                                                        | 49,86         | 3,00        | 2,00  |
| P07437 | Tubulin beta chain                                                            | 49,64         | 8,00        | 4,00  |
| Q9Y3D7 | Mitochondrial import inner membrane translocase subunit TIM16                 | 13,82         | 3,00        | 1,00  |
| Q3ZCQ8 | <b>Mitochondrial import inner membrane translocase subunit TIM50</b>          | <b>39,62</b>  | <b>3,00</b> |       |
| Q15388 | Mitochondrial import receptor subunit TOM20 homolog                           | 16,29         | 3,00        | 1,00  |
| Q961X5 | <b>Up-regulated during skeletal muscle growth protein 5</b>                   | <b>6,45</b>   | <b>3,00</b> |       |
| P25311 | Zinc-alpha-2-glycoprotein                                                     | 34,24         | 3,00        | 1,00  |
| P23246 | Splicing factor, proline- and glutamine-rich                                  | 76,10         |             | 3,00  |
| P78371 | T-complex protein 1 subunit beta                                              | 57,45         |             | 3,00  |
| P48643 | T-complex protein 1 subunit epsilon                                           | 59,63         |             | 3,00  |
| P05141 | ADP/ATP translocase 2                                                         | 32,83         | 9,00        | 7,00  |
| P12236 | ADP/ATP translocase 3                                                         | 32,85         | 9,00        | 6,00  |
| P05089 | Arginase-1                                                                    | 34,71         |             | 1,00  |
| P05023 | <b>Sodium/potassium-transporting ATPase subunit alpha-1</b>                   | <b>112,82</b> | <b>2,00</b> |       |
| P35613 | <b>Basigin</b>                                                                | <b>42,17</b>  | <b>2,00</b> |       |
| Q00587 | Cdc42 effector protein 1                                                      | 40,27         | 2,00        | 1,00  |
| Q43684 | <b>Mitotic checkpoint protein BUB3</b>                                        | <b>37,13</b>  | <b>2,00</b> |       |
| Q96L14 | <b>Cep170-like protein</b>                                                    | <b>32,63</b>  | <b>2,00</b> |       |
| P31944 | Caspase-14                                                                    | 27,66         | 2,00        | 1,00  |
| P07339 | Cathepsin D                                                                   | 44,52         | 2,00        | 1,00  |
| Q8NHZ8 | <b>Anaphase-promoting complex subunit CDC26</b>                               | <b>9,77</b>   | <b>2,00</b> |       |
| Q8N5K1 | CDGSH iron-sulfur domain-containing protein 2                                 | 15,27         | 2,00        | 1,00  |
| Q8WVK9 | Cytoskeleton-associated protein 2                                             | 76,94         | 2,00        | 2,00  |
| Q07065 | <b>Cytoskeleton-associated protein 4</b>                                      | <b>65,98</b>  | <b>2,00</b> |       |
| Q9Y224 | UPF0568 protein C14orf166                                                     | 28,05         | 2,00        | 1,00  |
| Q9Y2R0 | Cytochrome c oxidase assembly factor 3 homolog, mitochondrial                 | 11,72         | 2,00        | 2,00  |
| Q43809 | Cleavage and polyadenylation specificity factor subunit 5                     | 26,21         | 1,00        | 1,00  |
| P00367 | Glutamate dehydrogenase 1, mitochondrial                                      | 61,36         | 1,00        | 1,00  |
| Q43143 | Pre-mRNA-splicing factor ATP-dependent RNA helicase DHX15                     | 90,88         | 1,00        | 1,00  |
| Q9UBX3 | <b>Mitochondrial dicarboxylate carrier</b>                                    | <b>31,26</b>  | <b>2,00</b> |       |
| Q9NPF5 | <b>DNA methyltransferase 1-associated protein 1</b>                           | <b>52,96</b>  | <b>2,00</b> |       |
| P25685 | <b>DnaJ homolog subfamily B member 1</b>                                      | <b>38,02</b>  | <b>2,00</b> |       |
| Q75190 | DnaJ homolog subfamily B member 6                                             | 36,06         | 2,00        | 2,00  |
| Q61AN0 | <b>Dehydrogenase/reductase SDR family member 7B</b>                           | <b>35,10</b>  | <b>2,00</b> |       |
| Q95147 | <b>Dual specificity protein phosphatase 14</b>                                | <b>22,24</b>  | <b>2,00</b> |       |

|        |                                                                     |        |       |       |
|--------|---------------------------------------------------------------------|--------|-------|-------|
| P40939 | Trifunctional enzyme subunit alpha, mitochondrial                   | 82,95  | 2,00  |       |
| P26641 | Elongation factor 1-gamma                                           | 50,09  | 2,00  |       |
| Q5D862 | Filaggrin-2                                                         | 247,93 | 1,00  | 2,00  |
| Q14318 | Peptidyl-prolyl cis-trans isomerase FKBP8                           | 44,53  | 2,00  |       |
| Q9H936 | Mitochondrial glutamate carrier 1                                   | 34,45  | 2,00  |       |
| Q8NBJ4 | Golgi membrane protein 1                                            | 45,31  | 2,00  |       |
| P28799 | Granulins                                                           | 63,50  | 1,00  | 2,00  |
| P62805 | Histone H4                                                          | 11,36  | 1,00  | 1,00  |
| O00165 | HCLS1-associated protein X-1                                        | 31,60  | 2,00  | 1,00  |
| Q9UBN7 | Histone deacetylase 6                                               | 131,34 | 2,00  |       |
| P04792 | Heat shock protein beta-1                                           | 22,77  | 1,00  | 2,00  |
| P01857 | Ig gamma-1 chain C region                                           | 36,08  | 2,00  | 2,00  |
| P05783 | Keratin, type I cytoskeletal 18                                     | 48,03  | 2,00  | 3,00  |
| P02538 | Keratin, type II cytoskeletal 6A                                    | 60,01  | 16,00 | 22,00 |
| P04259 | Keratin, type II cytoskeletal 6B                                    | 60,03  | 17,00 | 21,00 |
| P78386 | Keratin, type II cuticular Hb5                                      | 55,77  | 9,00  | 7,00  |
| P31025 | Lipocalin-1                                                         | 19,24  | 2,00  |       |
| Q96AG4 | Leucine-rich repeat-containing protein 59                           | 34,91  | 2,00  | 2,00  |
| Q3MHD2 | Protein LSM12 homolog                                               | 21,69  | 2,00  | 1,00  |
| Q9H0U3 | Magnesium transporter protein 1                                     | 38,01  | 2,00  |       |
| Q9B0G0 | Myb-binding protein 1A                                              | 148,76 | 2,00  | 1,00  |
| Q13257 | Mitotic spindle assembly checkpoint protein MAD2A                   | 23,50  | 2,00  |       |
| P55081 | Microfibrillar-associated protein 1                                 | 51,93  | 2,00  |       |
| P60660 | Myosin light polypeptide 6                                          | 16,92  | 2,00  |       |
| Q969V3 | Nicalin                                                             | 62,93  | 2,00  |       |
| O60361 | Putative nucleoside diphosphate kinase                              | 15,52  | 2,00  | 1,00  |
| O00483 | Cytochrome c oxidase subunit NDUFA4                                 | 9,36   | 2,00  | 2,00  |
| Q16718 | NADH dehydrogenase [ubiquinone] 1 alpha subcomplex subunit 5        | 13,45  | 2,00  |       |
| O95168 | NADH dehydrogenase [ubiquinone] 1 beta subcomplex subunit 4         | 15,20  | 2,00  | 2,00  |
| Q9BPW8 | Protein NlpSnap homolog 1                                           | 33,29  | 2,00  | 1,00  |
| Q7Z417 | Nuclear fragile X mental retardation-interacting protein 2          | 76,07  | 2,00  |       |
| Q9H6K4 | Optic atrophy 3 protein                                             | 19,98  | 2,00  |       |
| Q99497 | Protein deglycase DJ-1                                              | 19,88  | 1,00  | 2,00  |
| O5EBL8 | PDZ domain-containing protein 11                                    | 16,12  | 2,00  | 2,00  |
| O00264 | Membrane-associated progesterone receptor component 1               | 21,66  | 2,00  | 1,00  |
| Q99959 | Plakophilin-2                                                       | 97,35  | 2,00  | 1,00  |
| P29590 | Protein PML                                                         | 97,49  | 2,00  |       |
| P62937 | Peptidyl-prolyl cis-trans isomerase A                               | 18,00  | 2,00  | 1,00  |
| Q06830 | Peroxioredoxin-1                                                    | 22,10  | 1,00  | 2,00  |
| Q96011 | Peroxisomal membrane protein 11B                                    | 28,41  | 2,00  |       |
| P07919 | Cytochrome b-c1 complex subunit 6, mitochondrial                    | 10,73  | 2,00  |       |
| O14949 | Cytochrome b-c1 complex subunit 8                                   | 9,90   | 2,00  | 1,00  |
| Q5XKPO | MICOS complex subunit MIC13                                         | 13,08  | 2,00  |       |
| P61026 | Ras-related protein Rab-10                                          | 22,53  | 2,00  |       |
| P11233 | Ras-related protein Ral-A                                           | 23,55  | 2,00  |       |
| P62491 | Ras-related protein Rab-11A                                         | 24,38  | 2,00  |       |
| Q8IUD2 | ELKS/Rab6-interacting/CAST family member 1                          | 128,01 | 2,00  |       |
| O14498 | RNA-binding protein 39                                              | 59,34  | 1,00  | 1,00  |
| Q8IUW5 | RELT-like protein 1                                                 | 29,32  | 2,00  |       |
| P62913 | 60S ribosomal protein L11                                           | 20,24  | 2,00  |       |
| P62750 | 60S ribosomal protein L23a                                          | 17,68  | 2,00  | 2,00  |
| P52815 | 39S ribosomal protein L12, mitochondrial                            | 21,33  | 2,00  |       |
| Q9NRX2 | 39S ribosomal protein L17, mitochondrial                            | 20,04  | 2,00  |       |
| P46783 | 40S ribosomal protein S10                                           | 18,89  | 2,00  | 2,00  |
| P62244 | 40S ribosomal protein S15a                                          | 14,83  | 1,00  | 2,00  |
| P62851 | 40S ribosomal protein S25                                           | 13,73  | 2,00  | 2,00  |
| P62753 | 40S ribosomal protein S6                                            | 28,66  | 2,00  | 1,00  |
| P46781 | 40S ribosomal protein S9                                            | 22,58  | 2,00  |       |
| Q7L412 | Arginine/serine-rich coiled-coil protein 2                          | 50,53  | 2,00  |       |
| Q86VD7 | Mitochondrial coenzyme A transporter SLC25A42                       | 35,39  | 2,00  |       |
| O75880 | Protein SCO1 homolog, mitochondrial                                 | 33,79  | 2,00  | 1,00  |
| Q43819 | Protein SCO2 homolog, mitochondrial                                 | 29,79  | 1,00  | 2,00  |
| Q75533 | Splicing factor 3B subunit 1                                        | 145,74 | 2,00  |       |
| Q9H9B4 | Sideroflexin-1                                                      | 35,60  | 2,00  | 1,00  |
| Q95470 | Sphingosine-1-phosphate lyase 1                                     | 63,48  | 2,00  |       |
| P62316 | Small nuclear ribonucleoprotein Sm D2                               | 13,52  | 2,00  | 1,00  |
| Q04837 | Single-stranded DNA-binding protein, mitochondrial                  | 17,25  | 1,00  | 1,00  |
| P43307 | Translocon-associated protein subunit alpha                         | 32,22  | 2,00  |       |
| P51571 | Translocon-associated protein subunit delta                         | 18,99  | 2,00  |       |
| P40227 | T-complex protein 1 subunit zeta                                    | 57,99  | 1,00  | 2,00  |
| Q8WUY1 | Protein THEM6                                                       | 23,85  | 2,00  |       |
| Q9UM00 | Calcium load-activated calcium channel                              | 21,16  | 2,00  |       |
| P53007 | Tricarboxylate transport protein, mitochondrial                     | 33,99  | 2,00  | 1,00  |
| Q95292 | Vesicle-associated membrane protein-associated protein B/C          | 27,21  | 3,00  |       |
| Q99536 | Synaptic vesicle membrane protein VAT-1 homolog                     | 41,89  | 1,00  | 2,00  |
| P45880 | Voltage-dependent anion-selective channel protein 2                 | 31,55  | 2,00  | 1,00  |
| Q9UEU0 | Vesicle transport through interaction with t-SNAREs homolog 1B      | 26,67  | 2,00  |       |
| Q96TA2 | ATP-dependent zinc metalloprotease YME1L1                           | 86,40  | 2,00  |       |
| Q9UBS4 | DnaJ homolog subfamily B member 11                                  | 40,49  |       | 2,00  |
| Q96F86 | Enhancer of mRNA-decapping protein 3                                | 56,04  |       | 2,00  |
| P50991 | T-complex protein 1 subunit delta                                   | 57,89  |       | 2,00  |
| P56378 | 6.8 kDa mitochondrial proteolipid                                   | 6,66   | 1,00  |       |
| Q9NRG9 | Aladin                                                              | 59,54  | 1,00  |       |
| Q8N2K0 | Monoacylglycerol lipase ABHD12                                      | 45,07  | 1,00  |       |
| Q9H845 | Acy-CoA dehydrogenase family member 9, mitochondrial                | 68,72  | 1,00  |       |
| P04075 | Fructose-bisphosphate aldolase A                                    | 39,40  | 1,00  |       |
| P04745 | Alpha-amylase 1                                                     | 57,73  | 1,00  |       |
| P07355 | Annexin A2                                                          | 38,58  | 1,00  |       |
| P05090 | Apolipoprotein D                                                    | 21,26  | 1,00  |       |
| Q6UXV4 | MICOS complex subunit MIC27                                         | 29,14  | 1,00  |       |
| Q9NW81 | ATP synthase subunit s-like protein                                 | 29,25  | 1,00  |       |
| O5T9A4 | ATPase family AAA domain-containing protein 3B                      | 72,53  | 15,00 | 6,00  |
| O00244 | Copper transport protein ATOX1                                      | 7,40   | 1,00  |       |
| Q9Y6H3 | Mitochondrial inner membrane protease ATP23 homolog                 | 28,06  | 1,00  |       |
| Q75947 | ATP synthase subunit d, mitochondrial                               | 18,48  | 1,00  | 1,00  |
| P56385 | ATP synthase subunit e, mitochondrial                               | 7,93   | 1,00  | 1,00  |
| P30049 | ATP synthase subunit delta, mitochondrial                           | 17,48  | 1,00  |       |
| Q94766 | Galactosylgalactosylxylosylprotein 3-beta-glucuronosyltransferase 3 | 37,10  | 1,00  |       |
| P51572 | B-cell receptor-associated protein 31                               | 27,97  | 1,00  |       |
| Q60566 | Mitotic checkpoint serine/threonine-protein kinase BUB1 beta        | 119,47 | 1,00  |       |



|        |                                                                                    |        |      |      |
|--------|------------------------------------------------------------------------------------|--------|------|------|
| Q13698 | Voltage-dependent L-type calcium channel subunit alpha-1S                          | 212,21 |      | 1,00 |
| P27482 | Calmodulin-like protein 3                                                          | 16,88  | 1,00 |      |
| P47755 | F-actin-capping protein subunit alpha-2                                            | 32,93  | 1,00 | 1,00 |
| Q8WWC4 | m-AAA protease-interacting protein 1, mitochondrial                                | 32,52  | 1,00 |      |
| Q13185 | Chromobox protein homolog 3                                                        | 20,80  | 1,00 |      |
| Q6P152 | Protein C3orf33                                                                    | 33,74  | 1,00 |      |
| P60953 | Cell division control protein 42 homolog                                           | 21,25  | 1,00 |      |
| Q6P1J9 | Parafibromin                                                                       | 60,54  | 1,00 |      |
| P41208 | Centrin-2                                                                          | 19,73  | 1,00 |      |
| O15182 | Centrin-3                                                                          | 19,54  | 1,00 |      |
| Q96HJ9 | Protein FMC1 homolog                                                               | 12,74  | 1,00 |      |
| Q9UFW8 | CGG triplet repeat-binding protein 1                                               | 18,81  | 1,00 |      |
| P61604 | 10 kDa heat shock protein, mitochondrial                                           | 10,92  | 1,00 |      |
| Q96BP2 | Coiled-coil-helix-coiled-coil-helix domain-containing protein 1                    | 13,47  | 1,00 | 1,00 |
| Q9BRQ6 | MICOS complex subunit MIC25                                                        | 26,44  | 1,00 |      |
| Q9NZ45 | CDGSH iron-sulfur domain-containing protein 1                                      | 12,19  | 1,00 |      |
| POC7P0 | CDGSH iron-sulfur domain-containing protein 3, mitochondrial                       | 14,21  | 1,00 | 1,00 |
| Q00610 | Clathrin heavy chain 1                                                             | 191,49 | 1,00 |      |
| Q86VU5 | Catechol O-methyltransferase domain-containing protein 1                           | 28,79  | 1,00 |      |
| Q9POS2 | Cytochrome c oxidase assembly protein COX16 homolog, mitochondrial                 | 12,29  | 1,00 |      |
| P00403 | Cytochrome c oxidase subunit 2                                                     | 25,55  | 1,00 | 1,00 |
| P13073 | Cytochrome c oxidase subunit 4 isoform 1, mitochondrial                            | 19,56  | 1,00 | 1,00 |
| Q9BSF4 | Mitochondrial import inner membrane translocase subunit Tim29                      | 29,22  | 1,00 |      |
| Q43822 | Protein C21orf2                                                                    | 28,32  | 1,00 |      |
| Q9UK59 | Lariat debranching enzyme                                                          | 61,52  | 1,00 |      |
| P61962 | DDB1- and CUL4-associated factor 7                                                 | 38,90  | 1,00 | 1,00 |
| Q8WWC6 | Dephospho-CoA kinase domain-containing protein                                     | 26,53  | 1,00 |      |
| Q7L014 | Probable ATP-dependent RNA helicase DDX46                                          | 117,29 | 1,00 |      |
| Q53GQ0 | Very-long-chain 3-oxoacyl-CoA reductase                                            | 34,30  | 1,00 |      |
| P51659 | Peroxisomal multifunctional enzyme type 2                                          | 79,64  | 1,00 | 1,00 |
| Q9NXW2 | DnaJ homolog subfamily B member 12                                                 | 41,79  | 1,00 |      |
| O00148 | ATP-dependent RNA helicase DDX39A                                                  | 49,10  | 1,00 |      |
| P55084 | Trifunctional enzyme subunit beta, mitochondrial                                   | 51,26  | 1,00 |      |
| P24534 | Elongation factor 1-beta                                                           | 24,75  | 1,00 |      |
| P50402 | Emerin                                                                             | 28,98  | 1,00 |      |
| O94905 | Erlin-2                                                                            | 37,82  | 1,00 |      |
| P30042 | ES1 protein homolog, mitochondrial                                                 | 28,15  | 1,00 |      |
| Q96A26 | Protein FAM162A                                                                    | 17,33  | 1,00 |      |
| Q9JLW8 | Mapk-regulated corepressor-interacting protein 1                                   | 10,91  | 1,00 |      |
| Q9UNN5 | FAS-associated factor 1                                                            | 73,91  | 1,00 | 1,00 |
| Q6ZVX7 | F-box only protein 50                                                              | 30,83  | 1,00 | 1,00 |
| P51114 | Fragile X mental retardation syndrome-related protein 1                            | 69,68  | 1,00 |      |
| Q8TAE8 | Growth arrest and DNA damage-inducible proteins-interacting protein 1              | 25,37  | 1,00 |      |
| P16520 | Guanine nucleotide-binding protein G(I)/G(S)/G(T) subunit beta-3                   | 37,20  | 1,00 |      |
| Q9UB16 | Guanine nucleotide-binding protein G(I)/G(S)/G(O) subunit gamma-12                 | 8,00   | 1,00 |      |
| Q8TB36 | Ganglioside-induced differentiation-associated protein 1                           | 41,32  | 1,00 |      |
| O75223 | Gamma-glutamylcyclotransferase                                                     | 20,99  | 1,00 |      |
| Q8N428 | Polypeptide N-acetylgalactosaminyltransferase 16                                   | 63,03  | 1,00 |      |
| P11488 | Guanine nucleotide-binding protein G(I) subunit alpha-1                            | 40,02  | 1,00 |      |
| POC055 | Histone H2A.Z                                                                      | 13,54  | 1,00 |      |
| P22830 | Ferrochelatase, mitochondrial                                                      | 47,83  | 1,00 | 1,00 |
| Q14103 | Heterogeneous nuclear ribonucleoprotein D0                                         | 38,41  | 1,00 | 1,00 |
| P07900 | Heat shock protein HSP 90-alpha                                                    | 84,61  | 2,00 |      |
| Q14197 | Peptidyl-tRNA hydrolase ICT1, mitochondrial                                        | 23,62  | 1,00 |      |
| B9A064 | Immunoglobulin lambda-like polypeptide 5                                           | 23,05  | 1,00 | 1,00 |
| Q96152 | Mitochondrial inner membrane protease subunit 2                                    | 19,71  | 1,00 |      |
| P12532 | Creatine kinase U-type, mitochondrial                                              | 47,01  | 1,00 |      |
| Q14525 | Keratin, type I cuticular Ha3-II                                                   | 46,18  | 6,00 | 2,00 |
| Q9UNZ5 | Leydig cell tumor 10 kDa protein homolog                                           | 10,57  |      | 1,00 |
| Q9GZ28 | Extracellular glycoprotein lacritin                                                | 14,24  | 1,00 |      |
| P00338 | L-lactate dehydrogenase A chain                                                    | 36,67  | 1,00 | 1,00 |
| P62310 | U6 snRNA-associated Sm-like protein LSM3                                           | 11,84  | 1,00 |      |
| Q9UNF1 | Melanoma-associated antigen D2                                                     | 64,91  | 1,00 |      |
| Q8NE86 | Calcium uniporter protein, mitochondrial                                           | 39,84  | 1,00 |      |
| Q86XN8 | RNA-binding protein MEX3D                                                          | 64,84  | 1,00 | 1,00 |
| P14174 | Macrophage migration inhibitory factor                                             | 12,47  | 1,00 | 1,00 |
| Q8IX12 | Mitochondrial Rho GTPase 1                                                         | 70,74  | 1,00 |      |
| Q15773 | Myeloid leukemia factor 2                                                          | 28,13  | 1,00 |      |
| Q15014 | Mortality factor 4-like protein 2                                                  | 32,29  | 1,00 |      |
| P13995 | Bifunctional methylenetetrahydrofolate dehydrogenase/cyclohydrolase, mitochondrial | 37,87  | 1,00 |      |
| Q8TB22 | MYCBP-associated protein                                                           | 108,09 | 1,00 | 1,00 |
| Q99417 | C-Myc-binding protein                                                              | 11,96  | 1,00 |      |
| Q9GZM8 | Nuclear distribution protein nudE-like 1                                           | 38,35  | 1,00 |      |
| P56556 | NADH dehydrogenase [ubiquinone] 1 alpha subcomplex subunit 6                       | 17,86  | 1,00 |      |
| P51970 | NADH dehydrogenase [ubiquinone] 1 alpha subcomplex subunit 8                       | 20,09  | 1,00 |      |
| Q9NX14 | NADH dehydrogenase [ubiquinone] 1 beta subcomplex subunit 11, mitochondrial        | 17,31  |      | 1,00 |
| E9PQ53 | NADH dehydrogenase [ubiquinone] 1 subunit C2, isoform 2                            | 13,40  | 1,00 | 1,00 |
| Q330K2 | NADH dehydrogenase (ubiquinone) complex I, assembly factor 6                       | 38,15  | 1,00 |      |
| Q75251 | NADH dehydrogenase [ubiquinone] iron-sulfur protein 7, mitochondrial               | 23,55  | 1,00 |      |
| Q8N9A8 | Nuclear envelope phosphatase-regulatory subunit 1                                  | 14,26  | 1,00 |      |
| Q75323 | Protein NipSnap homolog 2                                                          | 33,72  | 1,00 | 1,00 |
| Q9BSD7 | Cancer-related nucleoside-triphosphatase                                           | 20,70  | 1,00 |      |
| Q9BX56 | Nucleolar and spindle-associated protein 1                                         | 49,42  | 1,00 | 1,00 |
| Q15070 | Mitochondrial inner membrane protein OXA1L                                         | 48,52  | 1,00 |      |
| P32322 | Pyroline-5-carboxylate reductase 1, mitochondrial                                  | 33,34  | 1,00 |      |
| Q15365 | Poly(rC)-binding protein 1                                                         | 37,47  | 1,00 | 1,00 |
| Q15366 | Poly(rC)-binding protein 2                                                         | 38,56  | 2,00 |      |
| Q16342 | Programmed cell death protein 2                                                    | 38,57  | 1,00 |      |
| Q15173 | Membrane-associated progesterone receptor component 2                              | 23,80  | 1,00 |      |
| Q969N2 | GPI transamidase component FIG-T                                                   | 65,66  | 1,00 |      |
| Q9HAU0 | Pleckstrin homology domain-containing family A member 5                            | 127,38 | 1,00 |      |
| Q9Y3C6 | Peptidyl-prolyl cis-trans isomerase-like 1                                         | 18,23  | 1,00 |      |
| P28072 | Proteasome subunit beta type-6                                                     | 25,34  | 1,00 |      |
| Q8WXF1 | Paraspeckle component 1                                                            | 58,71  | 1,00 | 1,00 |
| PODJ07 | Protein PET100 homolog, mitochondrial                                              | 9,11   | 1,00 |      |
| Q9NR77 | Peroxisomal membrane protein 2                                                     | 22,24  | 1,00 |      |
| P51149 | Ras-related protein Rab-7a                                                         | 23,47  | 1,00 |      |
| Q5HY18 | Rab-like protein 3                                                                 | 26,41  | 1,00 |      |
| Q8IY67 | Ribonucleoprotein PTB-binding 1                                                    | 63,84  | 1,00 |      |
| Q5R372 | Rab GTPase-activating protein 1-like                                               | 92,45  |      | 1,00 |

|               |                                                                      |               |             |      |
|---------------|----------------------------------------------------------------------|---------------|-------------|------|
| P49756        | RNA-binding protein 25                                               | 100,12        | 1,00        | 1,00 |
| <b>P08134</b> | <b>Rho-related GTP-binding protein RhoC</b>                          | <b>21,99</b>  | <b>1,00</b> |      |
| P30050        | 60S ribosomal protein L12                                            | 17,81         | 1,00        | 1,00 |
| P18621        | 60S ribosomal protein L17                                            | 21,38         | 1,00        | 1,00 |
| <b>Q6P5R6</b> | <b>60S ribosomal protein L22-like 1</b>                              | <b>14,60</b>  | <b>1,00</b> |      |
| P35268        | 60S ribosomal protein L22                                            | 14,78         | 1,00        | 1,00 |
| P46776        | 60S ribosomal protein L27a                                           | 16,55         | 1,00        | 1,00 |
| <b>P61353</b> | <b>60S ribosomal protein L27</b>                                     | <b>15,79</b>  | <b>1,00</b> |      |
| <b>P46779</b> | <b>60S ribosomal protein L28</b>                                     | <b>15,74</b>  | <b>1,00</b> |      |
| P62899        | 60S ribosomal protein L31                                            | 14,45         | 1,00        | 1,00 |
| <b>P49207</b> | <b>60S ribosomal protein L34</b>                                     | <b>13,28</b>  | <b>1,00</b> |      |
| P83881        | 60S ribosomal protein L36a                                           | 12,43         | 1,00        | 1,00 |
| P62891        | 60S ribosomal protein L39                                            | 6,40          | 1,00        | 1,00 |
| <b>P62917</b> | <b>60S ribosomal protein L8</b>                                      | <b>28,01</b>  | <b>1,00</b> |      |
| <b>P32969</b> | <b>60S ribosomal protein L9</b>                                      | <b>21,85</b>  | <b>1,00</b> |      |
| Q96EL3        | 39S ribosomal protein L53, mitochondrial                             | 12,10         |             | 1,00 |
| <b>Q96E39</b> | <b>RNA binding motif protein, X-linked-like-1</b>                    | <b>42,12</b>  | <b>1,00</b> |      |
| <b>P09651</b> | <b>Heterogeneous nuclear ribonucleoprotein A1</b>                    | <b>38,72</b>  | <b>1,00</b> |      |
| <b>P22626</b> | <b>Heterogeneous nuclear ribonucleoproteins A2/B1</b>                | <b>37,41</b>  | <b>1,00</b> |      |
| <b>Q14684</b> | <b>Ribosomal RNA processing protein 1 homolog B</b>                  | <b>84,38</b>  | <b>1,00</b> |      |
| <b>P62841</b> | <b>40S ribosomal protein S15</b>                                     | <b>17,03</b>  | <b>1,00</b> |      |
| P08708        | 40S ribosomal protein S17                                            | 15,54         | 1,00        | 1,00 |
| P62854        | 40S ribosomal protein S26                                            | 13,01         | 1,00        | 1,00 |
| <b>P15880</b> | <b>40S ribosomal protein S2</b>                                      | <b>31,30</b>  | <b>1,00</b> |      |
| <b>Q9Y2R9</b> | <b>28S ribosomal protein S7, mitochondrial</b>                       | <b>28,12</b>  | <b>1,00</b> |      |
| <b>O15235</b> | <b>28S ribosomal protein S12, mitochondrial</b>                      | <b>15,16</b>  | <b>1,00</b> |      |
| O60783        | 28S ribosomal protein S14, mitochondrial                             | 15,13         |             | 1,00 |
| <b>P08621</b> | <b>U1 small nuclear ribonucleoprotein 70 kDa</b>                     | <b>51,53</b>  | <b>1,00</b> |      |
| <b>P08579</b> | <b>U2 small nuclear ribonucleoprotein B"</b>                         | <b>25,47</b>  | <b>1,00</b> |      |
| <b>Q9Y230</b> | <b>RuvB-like 2</b>                                                   | <b>51,12</b>  | <b>1,00</b> |      |
| A8MWD9        | Putative small nuclear ribonucleoprotein G-like protein 15           | 8,54          | 1,00        | 1,00 |
| <b>P05109</b> | <b>Protein S100-A8</b>                                               | <b>10,83</b>  | <b>1,00</b> |      |
| <b>Q9Y512</b> | <b>Sorting and assembly machinery component 50 homolog</b>           | <b>51,94</b>  | <b>1,00</b> |      |
| O15459        | Splicing factor 3A subunit 1                                         | 88,83         | 1,00        | 1,00 |
| <b>O75556</b> | <b>Mammaglobin-B</b>                                                 | <b>10,88</b>  | <b>1,00</b> |      |
| <b>Q9GZT3</b> | <b>SRA stem-loop-interacting RNA-binding protein, mitochondrial</b>  | <b>12,34</b>  | <b>1,00</b> |      |
| <b>P62314</b> | <b>Small nuclear ribonucleoprotein Sm D1</b>                         | <b>13,27</b>  | <b>1,00</b> |      |
| O8WV10        | Small integral membrane protein 4                                    | 8,69          | 1,00        | 1,00 |
| <b>Q96KF7</b> | <b>Small integral membrane protein 8</b>                             | <b>11,05</b>  | <b>1,00</b> |      |
| <b>Q13425</b> | <b>Beta-2-syntrophin</b>                                             | <b>57,91</b>  | <b>1,00</b> |      |
| Q13573        | SNW domain-containing protein 1                                      | 61,46         | 1,00        | 1,00 |
| <b>P0CG40</b> | <b>Transcription factor Sp9</b>                                      | <b>48,88</b>  | <b>1,00</b> |      |
| Q96P63        | Serpin B12                                                           | 46,25         | 1,00        | 1,00 |
| <b>Q96125</b> | <b>Splicing factor 45</b>                                            | <b>44,93</b>  | <b>1,00</b> |      |
| <b>P35321</b> | <b>Cornifin-A</b>                                                    | <b>9,87</b>   | <b>1,00</b> |      |
| O15269        | Serine palmitoyltransferase 1                                        | 52,71         | 1,00        | 1,00 |
| <b>Q9Y6N5</b> | <b>Sulfide:quinone oxidoreductase, mitochondrial</b>                 | <b>49,93</b>  | <b>1,00</b> |      |
| Q05519        | Serine/arginine-rich splicing factor 11                              | 53,51         | 1,00        | 1,00 |
| <b>Q9UNL2</b> | <b>Translocon-associated protein subunit gamma</b>                   | <b>21,07</b>  | <b>1,00</b> |      |
| <b>Q95793</b> | <b>Double-stranded RNA-binding protein Staufen homolog 1</b>         | <b>63,14</b>  | <b>1,00</b> |      |
| <b>Q9UJZ1</b> | <b>Stomatin-like protein 2, mitochondrial</b>                        | <b>38,51</b>  | <b>1,00</b> |      |
| <b>P07814</b> | <b>Bifunctional glutamate/proline--tRNA ligase</b>                   | <b>170,48</b> | <b>1,00</b> |      |
| Q9P2J5        | Leucine--tRNA ligase, cytoplasmic                                    | 134,38        | 1,00        | 1,00 |
| <b>Q9H061</b> | <b>Transmembrane protein 126A</b>                                    | <b>21,51</b>  | <b>1,00</b> |      |
| P68371        | Tubulin beta-4B chain                                                | 49,80         | 5,00        | 3,00 |
| P23258        | Tubulin gamma-1 chain                                                | 51,14         | 1,00        | 1,00 |
| P17987        | T-complex protein 1 subunit alpha                                    | 60,31         | 1,00        | 1,00 |
| <b>P49368</b> | <b>T-complex protein 1 subunit gamma</b>                             | <b>60,50</b>  | <b>1,00</b> |      |
| <b>Q08188</b> | <b>Protein-glutamine gamma-glutamyltransferase E</b>                 | <b>76,58</b>  | <b>1,00</b> |      |
| O86V81        | THO complex subunit 4                                                | 26,87         | 1,00        | 1,00 |
| <b>Q13263</b> | <b>Transcription intermediary factor 1-beta</b>                      | <b>88,49</b>  | <b>1,00</b> |      |
| <b>P62072</b> | <b>Mitochondrial import inner membrane translocase subunit Tim10</b> | <b>10,33</b>  | <b>1,00</b> |      |
| Q9BVC6        | Transmembrane protein 109                                            | 26,19         | 1,00        | 1,00 |
| <b>A0PJW6</b> | <b>Transmembrane protein 223</b>                                     | <b>22,03</b>  | <b>1,00</b> |      |
| <b>P57088</b> | <b>Transmembrane protein 33</b>                                      | <b>27,96</b>  | <b>1,00</b> |      |
| Q9UPN9        | E3 ubiquitin-protein ligase TRIM33                                   | 122,46        | 1,00        | 1,00 |
| Q01081        | Splicing factor U2AF 35 kDa subunit                                  | 27,85         |             | 1,00 |
| P0CG48        | Polyubiquitin-C                                                      | 76,99         | 1,00        |      |
| <b>Q9P0L0</b> | <b>Vesicle-associated membrane protein-associated protein A</b>      | <b>27,88</b>  | <b>2,00</b> |      |
| Q5T750        | Skin-specific protein 32                                             | 26,22         | 1,00        |      |
| <b>P13010</b> | <b>X-ray repair cross-complementing protein 5</b>                    | <b>82,65</b>  | <b>1,00</b> |      |
| Q9H0D6        | 5'-3' exonuclease 2                                                  | 108,51        | 1,00        | 1,00 |
| <b>Q95619</b> | <b>YEATS domain-containing protein 4</b>                             | <b>26,48</b>  | <b>1,00</b> |      |
| <b>Q96DA0</b> | <b>Zymogen granule protein 16 homolog B</b>                          | <b>22,72</b>  | <b>1,00</b> |      |
| <b>Q6PML9</b> | <b>Zinc transporter 9</b>                                            | <b>63,47</b>  | <b>1,00</b> |      |
| <b>Q96BW9</b> | <b>Phosphatidate cytidyltransferase, mitochondrial</b>               | <b>51,03</b>  | <b>1,00</b> |      |
| Q8N5G0        | Small integral membrane protein 20                                   | 7,70          | 1,00        | 1,00 |
| Q9HDC9        | Adipocyte plasma membrane-associated protein                         | 46,45         |             | 1,00 |
| P11586        | C-1-tetrahydrofolate synthase, cytoplasmic                           | 101,50        |             | 1,00 |
| O8N684        | Cleavage and polyadenylation specificity factor subunit 7            | 52,02         | 1,00        | 1,00 |
| P26196        | Probable ATP-dependent RNA helicase DDX6                             | 54,38         |             | 1,00 |
| Q96HP0        | Dedicator of cytokinesis protein 6                                   | 229,41        |             | 1,00 |
| Q03164        | Histone-lysine N-methyltransferase 2A                                | 431,50        |             | 1,00 |
| O60476        | Mannosyl-oligosaccharide 1,2-alpha-mannosidase IB                    | 72,96         |             | 1,00 |
| P33992        | DNA replication licensing factor MCM5                                | 82,23         |             | 1,00 |
| P40926        | Malate dehydrogenase, mitochondrial                                  | 35,48         |             | 1,00 |
| Q13765        | Nascent polypeptide-associated complex subunit alpha                 | 23,37         |             | 1,00 |
| Q9Y6V0        | Protein piccolo                                                      | 552,94        |             | 1,00 |
| P40937        | Replication factor C subunit 5                                       | 38,47         |             | 1,00 |
| P61513        | 60S ribosomal protein L37a                                           | 10,27         |             | 1,00 |
| P19474        | E3 ubiquitin-protein ligase TRIM21                                   | 54,14         |             | 1,00 |
| Q96EE3        | Nucleoporin SEH1                                                     | 39,62         |             | 1,00 |
| Q8TF72        | Protein Shroom3                                                      | 216,72        |             | 1,00 |
| Q99832        | T-complex protein 1 subunit eta                                      | 59,33         |             | 1,00 |
| Q9H6K5        | Proline-rich protein 36                                              | 132,67        |             | 1,00 |

**Table S2. Proteomic analysis of co-IP with Atox1 antibody as bait using MDA-MB-231 cells**

In bold are proteins identified in co-IP with anti-Atox1 monoclonal antibody but not in co-IP with monoclonal IgG isotype antibody as bait (i.e., hits). APC subunits underlined. See Materials for details.

| Accession/Uniprot | Description: protein name (alternative name)                      | MW [kDa]      | #Peptides Atox1 Ab co-IP | #Peptides Control Ab co-IP |
|-------------------|-------------------------------------------------------------------|---------------|--------------------------|----------------------------|
| Q15149            | Plectin                                                           | 531,47        | 43                       | 38                         |
| P35908            | Keratin, type II cytoskeletal 2 epidermal                         | 65,39         | 33                       | 25                         |
| P04264            | Keratin, type II cytoskeletal 1                                   | 66,00         | 31                       | 27                         |
| P13645            | Keratin, type I cytoskeletal 10                                   | 58,79         | 28                       | 23                         |
| P02538            | Keratin, type II cytoskeletal 6A                                  | 60,01         | 28                       | 20                         |
| P04259            | Keratin, type II cytoskeletal 6B                                  | 60,03         | 27                       | 19                         |
| P02533            | Keratin, type I cytoskeletal 14                                   | 51,53         | 25                       | 18                         |
| P13647            | Keratin, type II cytoskeletal 5                                   | 62,34         | 25                       | 21                         |
| P08779            | Keratin, type I cytoskeletal 16                                   | 51,24         | 24                       | 19                         |
| P05787            | Keratin, type II cytoskeletal 8                                   | 53,67         | 22                       | 21                         |
| Q04695            | Keratin, type I cytoskeletal 17                                   | 48,08         | 21                       | 17                         |
| O43790            | Keratin, type II cuticular Hb6                                    | 53,47         | 21                       | 17                         |
| P78385            | Keratin, type II cuticular Hb3                                    | 54,16         | 19                       | 14                         |
| P15924            | Desmoplakin                                                       | 331,57        | 18                       | 23                         |
| P35527            | Keratin, type I cytoskeletal 9                                    | 62,03         | 18                       | 17                         |
| P08729            | Keratin, type II cytoskeletal 7                                   | 51,35         | 18                       | 15                         |
| P08727            | Keratin, type I cytoskeletal 19                                   | 44,08         | 17                       | 18                         |
| P78386            | Keratin, type II cuticular Hb5                                    | 55,77         | 16                       | 15                         |
| <b>Q9UJX3</b>     | <b>Anaphase-promoting complex subunit 7</b>                       | <b>66,81</b>  | <b>14</b>                |                            |
| P08670            | Vimentin                                                          | 53,62         | 14                       | 11                         |
| Q15323            | Keratin, type I cuticular Ha1                                     | 47,21         | 12                       | 13                         |
| P05783            | Keratin, type I cytoskeletal 18                                   | 48,03         | 11                       | 10                         |
| Q14525            | Keratin, type I cuticular Ha3-II                                  | 46,18         | 11                       | 12                         |
| <b>P30260</b>     | <b>Cell division cycle protein 27 homolog (ANAPC3)</b>            | <b>91,81</b>  | <b>10</b>                |                            |
| Q01546            | Keratin, type II cytoskeletal 2 oral                              | 65,80         | 10                       | 8                          |
| O76011            | Keratin, type I cuticular Ha4                                     | 49,39         | 10                       | 9                          |
| P23246            | Splicing factor, proline- and glutamine-rich                      | 76,10         | 10                       | 11                         |
| P07437            | Tubulin beta chain                                                | 49,64         | 10                       | 3                          |
| P68104            | Elongation factor 1-alpha 1                                       | 50,11         | 9                        | 4                          |
| P13646            | Keratin, type I cytoskeletal 13                                   | 49,56         | 9                        | 12                         |
| Q7Z794            | Keratin, type II cytoskeletal 1b                                  | 61,86         | 9                        | 6                          |
| P62269            | 40S ribosomal protein S18                                         | 17,71         | 9                        | 8                          |
| P68371            | Tubulin beta-4B chain                                             | 49,80         | 9                        | 3                          |
| P11142            | Heat shock cognate 71 kDa protein                                 | 70,85         | 8                        | 5                          |
| P11940            | Polyadenylate-binding protein 1                                   | 70,63         | 8                        | 6                          |
| P23396            | 40S ribosomal protein S3                                          | 26,67         | 8                        | 5                          |
| Q02413            | Desmoglein-1                                                      | 113,68        | 7                        | 4                          |
| Q14764            | Major vault protein                                               | 99,27         | 7                        | 4                          |
| <b>Q8WWW7</b>     | <b>Ataxin-2-like protein</b>                                      | <b>113,30</b> | <b>6</b>                 |                            |
| Q14CN4            | Keratin, type II cytoskeletal 72                                  | 55,84         | 6                        | 4                          |
| Q8N1N4            | Keratin, type II cytoskeletal 78                                  | 56,83         | 6                        | 5                          |
| Q9NSB2            | Keratin, type II cuticular Hb4                                    | 64,80         | 6                        | 5                          |
| P60709            | Actin, cytoplasmic 1                                              | 41,71         | 5                        | 7                          |
| P05141            | ADP/ATP translocase 2                                             | 32,83         | 5                        | 2                          |
| P12236            | ADP/ATP translocase 3                                             | 32,85         | 5                        | 1                          |
| <b>Q9UJX4</b>     | <b>Anaphase-promoting complex subunit 5</b>                       | <b>85,02</b>  | <b>5</b>                 |                            |
| Q13283            | Ras GTPase-activating protein-binding protein 1                   | 52,13         | 5                        | 4                          |
| P28799            | Granulins                                                         | 63,50         | 5                        | 2                          |
| <b>Q6KB66</b>     | <b>Keratin, type II cytoskeletal 80</b>                           | <b>50,49</b>  | <b>5</b>                 |                            |
| Q15233            | Non-POU domain-containing octamer-binding protein                 | 54,20         | 5                        | 4                          |
| Q13310            | Polyadenylate-binding protein 4                                   | 70,74         | 5                        | 2                          |
| P14923            | Junction plakoglobin                                              | 81,69         | 5                        | 3                          |
| Q9UHX1            | Poly(U)-binding-splicing factor PUF60                             | 59,84         | 5                        | 4                          |
| Q96PK6            | RNA-binding protein 14                                            | 69,45         | 5                        | 6                          |
| P62263            | 40S ribosomal protein S14                                         | 16,26         | 5                        | 3                          |
| P62249            | 40S ribosomal protein S16                                         | 16,44         | 5                        | 4                          |
| <b>Q13042</b>     | <b>Cell division cycle protein 16 homolog (ANAPC6)</b>            | <b>71,61</b>  | <b>4</b>                 |                            |
| P17844            | Probable ATP-dependent RNA helicase DDX5                          | 69,10         | 4                        | 3                          |
| P11021            | 78 kDa glucose-regulated protein                                  | 72,29         | 4                        | 2                          |
| P52272            | Heterogeneous nuclear ribonucleoprotein M                         | 77,46         | 4                        | 1                          |
| P01876            | Ig alpha-1 chain C region                                         | 37,63         | 4                        | 1                          |
| P35579            | Myosin-9                                                          | 226,39        | 4                        | 9                          |
| P22626            | Heterogeneous nuclear ribonucleoproteins A2/B1                    | 37,41         | 4                        | 2                          |
| P62701            | 40S ribosomal protein S4, X isoform                               | 29,58         | 4                        | 1                          |
| <b>P82979</b>     | <b>SAP domain-containing ribonucleoprotein</b>                    | <b>23,66</b>  | <b>4</b>                 |                            |
| Q8TF42            | Ubiquitin-associated and SH3 domain-containing protein B          | 72,65         | 4                        | 3                          |
| P63267            | Actin, gamma-enteric smooth muscle                                | 41,85         | 3                        | 6                          |
| P07355            | Annexin A2                                                        | 38,58         | 3                        | 3                          |
| Q9NWB6            | Arginine and glutamate-rich protein 1                             | 33,20         | 3                        | 2                          |
| Q14444            | Caprin-1                                                          | 78,32         | 3                        | 3                          |
| <b>Q9UJX2</b>     | <b>Cell division cycle protein 23 homolog (ANAPC8)</b>            | <b>68,79</b>  | <b>3</b>                 |                            |
| P81605            | Dermcidin                                                         | 11,28         | 3                        | 3                          |
| Q9UN86            | Ras GTPase-activating protein-binding protein 2                   | 54,09         | 3                        | 2                          |
| P04406            | Glyceraldehyde-3-phosphate dehydrogenase                          | 36,03         | 3                        | 3                          |
| <b>P38646</b>     | <b>Stress-70 protein, mitochondrial</b>                           | <b>73,63</b>  | <b>3</b>                 |                            |
| P04792            | Heat shock protein beta-1                                         | 22,77         | 3                        | 2                          |
| O76013            | Keratin, type I cuticular Ha6                                     | 52,21         | 3                        | 3                          |
| <b>P02545</b>     | <b>Prelamin-A/C</b>                                               | <b>74,09</b>  | <b>3</b>                 |                            |
| Q00325            | Phosphate carrier protein, mitochondrial                          | 40,07         | 3                        | 1                          |
| <b>Q7Z417</b>     | <b>Nuclear fragile X mental retardation-interacting protein 2</b> | <b>76,07</b>  | <b>3</b>                 |                            |
| P62280            | 40S ribosomal protein S11                                         | 18,42         | 3                        | 3                          |
| P39019            | 40S ribosomal protein S19                                         | 16,05         | 3                        | 3                          |
| P67809            | Nuclease-sensitive element-binding protein 1                      | 35,90         | 3                        | 2                          |
| <b>Q9Y305</b>     | <b>Acyl-coenzyme A thioesterase 9, mitochondrial</b>              | <b>49,87</b>  | <b>2</b>                 |                            |
| <b>P02768</b>     | <b>Serum albumin</b>                                              | <b>69,32</b>  | <b>2</b>                 |                            |
| <b>Q9H1A4</b>     | <b>Anaphase-promoting complex subunit 1</b>                       | <b>216,36</b> | <b>2</b>                 |                            |

|        |                                                             |        |   |   |
|--------|-------------------------------------------------------------|--------|---|---|
| O00244 | Copper transport protein ATOX1                              | 7,40   | 2 |   |
| O43684 | Mitotic checkpoint protein BUB3                             | 37,13  | 2 | 1 |
| P31944 | Caspase-14                                                  | 27,66  | 2 | 2 |
| P04040 | Catalase                                                    | 59,72  | 2 | 1 |
| P07339 | Cathepsin D                                                 | 44,52  | 2 | 1 |
| O9UBS4 | DnaJ homolog subfamily B member 11                          | 40,49  | 2 | 2 |
| O75190 | DnaJ homolog subfamily B member 6                           | 36,06  | 2 | 1 |
| O5D862 | Filaggrin-2                                                 | 247,93 | 2 | 2 |
| O75223 | Gamma-glutamylcyclotransferase                              | 20,99  | 2 |   |
| Q96QA5 | Gasdermin-A                                                 | 49,33  | 2 | 1 |
| O8WUF5 | RelA-associated inhibitor                                   | 89,04  | 2 | 5 |
| P01857 | Ig gamma-1 chain C region                                   | 36,08  | 2 | 2 |
| P42167 | Lamina-associated polypeptide 2, isoforms beta/gamma        | 50,64  | 2 |   |
| P31025 | Lipocalin-1                                                 | 19,24  | 2 |   |
| P47929 | Galectin-7                                                  | 15,07  | 2 | 2 |
| Q8WW11 | LIM domain only protein 7                                   | 192,58 | 2 | 2 |
| Q3MHD2 | Protein LSM12 homolog                                       | 21,69  | 2 |   |
| P61626 | Lysozyme C                                                  | 16,53  | 2 | 2 |
| O95168 | NADH dehydrogenase [ubiquinone] 1 beta subcomplex subunit 4 | 15,20  | 2 |   |
| P06748 | Nucleophosmin                                               | 32,55  | 2 | 1 |
| Q9BSD7 | Cancer-related nucleoside-triphosphatase                    | 20,70  | 2 | 1 |
| Q15366 | Poly(rC)-binding protein 2                                  | 38,56  | 2 |   |
| Q99623 | Prohibitin-2                                                | 33,28  | 2 | 2 |
| P22061 | Protein-L-isoaspartate(D-aspartate) O-methyltransferase     | 24,62  | 2 | 1 |
| Q99959 | Plakophilin-2                                               | 97,35  | 2 | 1 |
| P32119 | Peroxisiredoxin-2                                           | 21,88  | 2 | 1 |
| P35268 | 60S ribosomal protein L22                                   | 14,78  | 2 | 2 |
| P62750 | 60S ribosomal protein L23a                                  | 17,68  | 2 | 2 |
| P62829 | 60S ribosomal protein L23                                   | 14,86  | 2 | 2 |
| P09651 | Heterogeneous nuclear ribonucleoprotein A1                  | 38,72  | 2 | 2 |
| P46783 | 40S ribosomal protein S10                                   | 18,89  | 2 | 2 |
| P62277 | 40S ribosomal protein S13                                   | 17,21  | 2 | 2 |
| P62244 | 40S ribosomal protein S15a                                  | 14,83  | 2 | 2 |
| P08708 | 40S ribosomal protein S17                                   | 15,54  | 2 |   |
| P60866 | 40S ribosomal protein S20                                   | 13,36  | 2 |   |
| P62851 | 40S ribosomal protein S25                                   | 13,73  | 2 | 3 |
| P46782 | 40S ribosomal protein S5                                    | 22,86  | 2 | 3 |
| Q9Y310 | tRNA-splicing ligase RtcB homolog                           | 55,17  | 2 |   |
| P06703 | Protein S100-A6                                             | 10,17  | 2 | 1 |
| P05109 | Protein S100-A8                                             | 10,83  | 2 | 1 |
| Q96P63 | Serpin B12                                                  | 46,25  | 2 | 1 |
| Q9Y6N5 | Sulfide:quinone oxidoreductase, mitochondrial               | 49,93  | 2 | 1 |
| P37108 | Signal recognition particle 14 kDa protein                  | 14,56  | 2 | 2 |
| Q9BQE3 | Tubulin alpha-1C chain                                      | 49,86  | 2 | 2 |
| P22735 | Protein-glutamine gamma-glutamyltransferase K               | 89,73  | 2 |   |
| P25311 | Zinc-alpha-2-glycoprotein                                   | 34,24  | 2 | 2 |
| E9PRG8 | Uncharacterized protein C11orf98                            | 13,79  | 2 |   |
| Q9UJX6 | Anaphase-promoting complex subunit 2                        | 93,77  | 1 |   |
| Q9UM13 | Anaphase-promoting complex subunit 10                       | 21,24  | 1 |   |
| Q96DE5 | Anaphase-promoting complex subunit 16                       | 11,66  | 1 |   |
| Q9UJX5 | Anaphase-promoting complex subunit 4                        | 92,06  | 1 |   |
| P18085 | ADP-ribosylation factor 4                                   | 20,50  | 1 |   |
| P05089 | Arginase-1                                                  | 34,71  | 1 | 1 |
| P56385 | ATP synthase subunit e, mitochondrial                       | 7,93   | 1 | 1 |
| Q8NHZ8 | Anaphase-promoting complex subunit CDC26                    | 9,77   | 1 |   |
| P06493 | Cyclin-dependent kinase 1                                   | 34,07  | 1 |   |
| Q15517 | Corneodesmosin                                              | 51,49  | 1 |   |
| Q9NX63 | MICOS complex subunit MIC19                                 | 26,14  | 1 |   |
| Q9Y224 | UPF0568 protein C14orf166                                   | 28,05  | 1 | 1 |
| P27658 | Collagen alpha-1(VIII) chain                                | 73,32  | 1 | 1 |
| P21291 | Cysteine and glycine-rich protein 1                         | 20,55  | 1 |   |
| O00622 | Protein CYR61                                               | 42,00  | 1 |   |
| P01040 | Cystatin-A                                                  | 11,00  | 1 | 1 |
| Q15828 | Cystatin-M                                                  | 16,50  | 1 |   |
| O15523 | ATP-dependent RNA helicase DDX3Y                            | 73,11  | 1 | 1 |
| P31689 | DnaJ homolog subfamily A member 1                           | 44,84  | 1 |   |
| O60884 | DnaJ homolog subfamily A member 2                           | 45,72  | 1 | 1 |
| O60762 | Dolichol-phosphate mannosyltransferase subunit 1            | 29,62  | 1 | 1 |
| Q08554 | Desmocollin-1                                               | 99,92  | 1 |   |
| P29692 | Elongation factor 1-delta                                   | 31,10  | 1 |   |
| P26641 | Elongation factor 1-gamma                                   | 50,09  | 1 |   |
| P49411 | Elongation factor Tu, mitochondrial                         | 49,51  | 1 |   |
| P06733 | Alpha-enolase                                               | 47,14  | 1 |   |
| Q62VX7 | F-box only protein 50                                       | 30,83  | 1 | 1 |
| P35637 | RNA-binding protein FUS                                     | 53,39  | 1 | 2 |
| P51114 | Fragile X mental retardation syndrome-related protein 1     | 69,68  | 1 |   |
| P22492 | Histone H1t                                                 | 22,01  | 1 | 1 |
| P0C055 | Histone H2A.Z                                               | 13,54  | 1 | 1 |
| O60814 | Histone H2B type 1-K                                        | 13,88  | 1 | 2 |
| P62805 | Histone H4                                                  | 11,36  | 1 | 2 |
| Q14103 | Heterogeneous nuclear ribonucleoprotein D0                  | 38,41  | 1 | 1 |
| P61978 | Heterogeneous nuclear ribonucleoprotein K                   | 50,94  | 1 |   |
| O60506 | Heterogeneous nuclear ribonucleoprotein Q                   | 69,56  | 1 |   |
| P05198 | Eukaryotic translation initiation factor 2 subunit 1        | 36,09  | 1 | 1 |
| P06730 | Eukaryotic translation initiation factor 4E                 | 25,08  | 1 |   |
| P01591 | Immunoglobulin J chain                                      | 18,09  | 1 |   |
| B9A064 | Immunoglobulin lambda-like polypeptide 5                    | 23,05  | 1 |   |
| Q5T749 | Keratinocyte proline-rich protein                           | 64,09  | 1 |   |
| P14618 | Pyruvate kinase PKM                                         | 57,90  | 1 |   |

|                   |                                                                      |               |          |    |
|-------------------|----------------------------------------------------------------------|---------------|----------|----|
| <b>Q9Y383</b>     | <b>Putative RNA-binding protein Luc7-like 2</b>                      | <b>46,49</b>  | <b>1</b> |    |
| Q96AG4            | Leucine-rich repeat-containing protein 59                            | 34,91         | 1        | 1  |
| P26038            | Moesin                                                               | 67,78         | 1        | 2  |
| Q06830            | Peroxisredoxin-1                                                     | 22,10         | 1        | 1  |
| <b>P60900</b>     | <b>Proteasome subunit alpha type-6</b>                               | <b>27,38</b>  | <b>1</b> |    |
| <b>P28072</b>     | <b>Proteasome subunit beta type-6</b>                                | <b>25,34</b>  | <b>1</b> |    |
| <b>P22695</b>     | <b>Cytochrome b-c1 complex subunit 2, mitochondrial</b>              | <b>48,41</b>  | <b>1</b> |    |
| O14949            | Cytochrome b-c1 complex subunit 8                                    | 9,90          | 1        | 1  |
| <b>O00391</b>     | <b>Sulfhydryl oxidase 1</b>                                          | <b>82,53</b>  | <b>1</b> |    |
| Q81Y67            | Ribonucleoprotein PTB-binding 1                                      | 63,84         | 1        | 1  |
| <b>P49756</b>     | <b>RNA-binding protein 25</b>                                        | <b>100,12</b> | <b>1</b> |    |
| <b>P29558</b>     | <b>RNA-binding motif, single-stranded-interacting protein 1</b>      | <b>44,48</b>  | <b>1</b> |    |
| P62913            | 60S ribosomal protein L11                                            | 20,24         | 1        | 1  |
| P30050            | 60S ribosomal protein L12                                            | 17,81         | 1        | 1  |
| <b>P26373</b>     | <b>60S ribosomal protein L13</b>                                     | <b>24,25</b>  | <b>1</b> |    |
| <b>P61254</b>     | <b>60S ribosomal protein L26</b>                                     | <b>17,25</b>  | <b>1</b> |    |
| <b>P62888</b>     | <b>60S ribosomal protein L30</b>                                     | <b>12,78</b>  | <b>1</b> |    |
| P62899            | 60S ribosomal protein L31                                            | 14,45         | 1        | 2  |
| P42766            | 60S ribosomal protein L35                                            | 14,54         | 1        | 1  |
| P61513            | 60S ribosomal protein L37a                                           | 10,27         | 1        | 1  |
| <b>P63173</b>     | <b>60S ribosomal protein L38</b>                                     | <b>8,21</b>   | <b>1</b> |    |
| <b>Q6P1L8</b>     | <b>39S ribosomal protein L14, mitochondrial</b>                      | <b>15,94</b>  | <b>1</b> |    |
| P62841            | 40S ribosomal protein S15                                            | 17,03         | 1        | 1  |
| <b>P62266</b>     | <b>40S ribosomal protein S23</b>                                     | <b>15,80</b>  | <b>1</b> |    |
| <b>P42677</b>     | <b>40S ribosomal protein S27</b>                                     | <b>9,45</b>   | <b>1</b> |    |
| P62857            | 40S ribosomal protein S28                                            | 7,84          | 1        | 1  |
| P62273            | 40S ribosomal protein S29                                            | 6,67          | 1        | 1  |
| P15880            | 40S ribosomal protein S2                                             | 31,30         | 1        | 1  |
| P62861            | 40S ribosomal protein S30                                            | 6,64          | 1        | 1  |
| <b>P62753</b>     | <b>40S ribosomal protein S6</b>                                      | <b>28,66</b>  | <b>1</b> |    |
| <b>P08865</b>     | <b>40S ribosomal protein SA</b>                                      | <b>32,83</b>  | <b>1</b> |    |
| <b>P08579</b>     | <b>U2 small nuclear ribonucleoprotein B''</b>                        | <b>25,47</b>  | <b>1</b> |    |
| P31151            | Protein S100-A7                                                      | 11,46         | 1        | 1  |
| <b>Q9HCY8</b>     | <b>Protein S100-A14</b>                                              | <b>11,65</b>  | <b>1</b> |    |
| <b>Q9UHR5</b>     | <b>SAP30-binding protein</b>                                         | <b>33,85</b>  | <b>1</b> |    |
| <b>P17900</b>     | <b>Ganglioside GM2 activator</b>                                     | <b>20,82</b>  | <b>1</b> |    |
| <b>Q6UWP8</b>     | <b>Suprabasin</b>                                                    | <b>60,50</b>  | <b>1</b> |    |
| <b>Q6NUK1</b>     | <b>Calcium-binding mitochondrial carrier protein SCaMC-1</b>         | <b>53,32</b>  | <b>1</b> |    |
| Q99470            | Stromal cell-derived factor 2                                        | 23,01         | 1        | 1  |
| <b>Q15637</b>     | <b>Splicing factor 1</b>                                             | <b>68,29</b>  | <b>1</b> |    |
| <b>Q13435</b>     | <b>Splicing factor 3B subunit 2</b>                                  | <b>100,16</b> | <b>1</b> |    |
| O75556            | Mammaglobin-B                                                        | 10,88         | 1        | 1  |
| Q8TF72            | Protein Shroom3                                                      | 216,72        | 1        | 1  |
| P35321            | Corniflin-A                                                          | 9,87          | 1        | 1  |
| <b>Q04837</b>     | <b>Single-stranded DNA-binding protein, mitochondrial</b>            | <b>17,25</b>  | <b>1</b> |    |
| Q95793            | Double-stranded RNA-binding protein Staufen homolog 1                | 63,14         | 1        | 2  |
| Q08188            | Protein-glutamine gamma-glutamyltransferase E                        | 76,58         | 1        | 1  |
| P10599            | Thioredoxin                                                          | 11,73         | 1        | 1  |
| <b>Q9Y3D7</b>     | <b>Mitochondrial import inner membrane translocase subunit TIM14</b> | <b>13,82</b>  | <b>1</b> |    |
| <b>Q12931</b>     | <b>Heat shock protein 75 kDa, mitochondrial</b>                      | <b>80,06</b>  | <b>1</b> |    |
| <b>Q01081</b>     | <b>Splicing factor U2AF 35 kDa subunit</b>                           | <b>27,85</b>  | <b>1</b> |    |
| <b>Q8WWV7</b>     | <b>WAP four-disulfide core domain protein 12</b>                     | <b>12,04</b>  | <b>1</b> |    |
| A4UGR9            | Xin actin-binding repeat-containing protein 2                        | 382,06        | 1        | 1  |
| <b>A0A096LP55</b> | <b>Cytochrome b-c1 complex subunit 6-like, mitochondrial</b>         | <b>10,74</b>  | <b>1</b> |    |
| <b>Q9BWM7</b>     | <b>Sideroflexin-3</b>                                                | <b>35,48</b>  | <b>1</b> |    |
| O43809            | Cleavage and polyadenylation specificity factor subunit 5            | 26,21         |          | 1  |
| O43854            | EGF-like repeat and discoidin I-like domain-containing protein 3     | 53,73         |          | 1  |
| P62081            | 40S ribosomal protein S7                                             | 22,11         |          | 2  |
| P0CG48            | Polyubiquitin-C                                                      | 76,99         |          | 1  |
| Q01844            | RNA-binding protein EWS                                              | 68,44         |          | 1  |
| Q01469            | Fatty acid-binding protein, epidermal                                | 15,15         |          | 1  |
| P68431            | Histone H3.1                                                         | 15,39         |          | 1  |
| P17096            | High mobility group protein HMG-I/HMG-Y                              | 11,67         |          | 2  |
| Q86YZ3            | Hornerin                                                             | 282,23        |          | 1  |
| Q92615            | La-related protein 4B                                                | 80,50         |          | 5  |
| P55081            | Microfibrillar-associated protein 1                                  | 51,93         |          | 1  |
| Q96DR8            | Mucin-like protein 1                                                 | 9,03          |          | 1  |
| P12882            | Myosin-1                                                             | 223,01        |          | 12 |
| Q9UKX2            | Myosin-2                                                             | 222,91        |          | 12 |
| P22531            | Small proline-rich protein 2E                                        | 7,85          |          | 1  |
| P67936            | Tropomyosin alpha-4 chain                                            | 28,50         |          | 1  |
